# Supplementary material for: Patients’ Positive and Negative Responses to Reading Mental Health Clinical Notes Online
Source: Atypon-hosted journal article supplement (doi:10.1176/appi.ps.201700353), 2018-03-01
Supplement: appi.ps.201700353.ds001.pdf [file appi.ps.201700353.ds001.pdf]

## Participant characteristics, n=178

| Variable                                       | n       | %  |
|------------------------------------------------|---------|----|
| Demographic characteristics                    |         |    |
| Age (M±SD)                                     | 55.4±13 |    |
| Male (vs. female)                              | 141     | 79 |
| Minority status (vs. white, non-Hispanic)      | 24      | 14 |
| Marital status                                 |         |    |
| Married                                        | 100     | 57 |
| Single, never married                          | 18      | 10 |
| Divorced, separated, or widowed                | 58      | 33 |
| Education                                      |         |    |
| High school or GED                             | 12      | 7  |
| Some College                                   | 85      | 48 |
| 4-year college degree                          | 25      | 14 |
| More than 4-year college degree                | 54      | 30 |
| Employment status                              |         |    |
| Disabled/unable to work                        | 67      | 38 |
| Unemployed                                     | 14      | 8  |
| Employed                                       | 38      | 22 |
| Retired                                        | 57      | 32 |
| Service connected                              | 149     | 84 |
| Mental health utilization and diagnoses        |         |    |
| Mental health visits (M±SD)                    | 19.9±27 |    |
| Anxiety                                        | 57      | 32 |
| Depression                                     | 113     | 64 |
| Post-Traumatic Stress Disorder                 | 113     | 64 |
| Substance Use Disorder                         | 46      | 26 |
| Personality Disorder                           | 23      | 13 |
| Psychotic/Bipolar Spectrum Disorder            | 30      | 17 |
| Responses to Open Notes                        |         |    |
| Health self-efficacy <sup>a</sup> (M±SD)       | 3.3±1.0 |    |
| Health knowledge <sup>b</sup> (M±SD)           | 3.2±1.0 |    |
| Patient-clinician alliance <sup>c</sup> (M±SD) | 3.5±.9  |    |
| Negative emotions <sup>d</sup> (M±SD)          | 2.1±.9  |    |

<sup>a</sup>Possible scores range from 1 to 5, with higher scores indicating higher levels of health self-efficacy

<sup>b</sup>Possible scores range from 1 to 5, with higher scores indicating higher levels of health knowledge

<sup>c</sup>Possible scores range from 1 to 5, with higher scores indicating stronger patient-clinician alliance

<sup>d</sup>Possible scores range from 1 to 5, with higher scores indicating more frequent negative emotions



Bivariate correlations of study variables

|                                      | 1      | 2    | 3      | 4     | 5     | 6     | 7    | 8    | 9     | 10      | 11     | 12      | 13 |
|--------------------------------------|--------|------|--------|-------|-------|-------|------|------|-------|---------|--------|---------|----|
| 1. Age                               | --     |      |        |       |       |       |      |      |       |         |        |         |    |
| 2. Education                         | .10    | --   |        |       |       |       |      |      |       |         |        |         |    |
| 3. Mental health visits <sup>a</sup> | -.12   | .06  | --     |       |       |       |      |      |       |         |        |         |    |
| 4. Anxiety                           | -.23** | .03  | -.01   | --    |       |       |      |      |       |         |        |         |    |
| 5. Depression                        | -.06   | -.10 | .07    | .02   | --    |       |      |      |       |         |        |         |    |
| 6. PTSD                              | .11    | .04  | .19*   | -.16* | -.07  | --    |      |      |       |         |        |         |    |
| 7. Substance use disorder            | .04    | -.03 | .27*** | -.13  | .10   | .08   | --   |      |       |         |        |         |    |
| 8. Personality disorder              | -.01   | -.02 | .07    | .10   | .12   | -.13  | .08  | --   |       |         |        |         |    |
| 9. Psychotic/Bipolar <sup>b</sup>    | .04    | .07  | -.05   | .05   | -.19* | -.13  | .01  | -.08 | --    |         |        |         |    |
| 10. Health self-efficacy             | -.08   | -.06 | .05    | .01   | -.06  | .01   | -.04 | .02  | .09   | --      |        |         |    |
| 11. Health knowledge                 | -.08   | -.14 | .02    | -.01  | -.07  | .08   | .00  | .00  | -.01  | .83***  | --     |         |    |
| 12. Patient-clinician alliance       | .08    | -.13 | -.01   | .02   | -.09  | .14   | -.05 | -.04 | .04   | .53***  | .52*** | --      |    |
| 13. Negative emotions                | -.04   | -.10 | .15*   | .00   | .06   | .23** | -.02 | .13  | -.15* | -.27*** | -.18*  | -.27*** | -- |

\* $p < .05$ , \*\* $p < .01$ , \*\*\* $p < .001$

<sup>a</sup>Number of mental health visits; <sup>b</sup>Psychotic or bipolar spectrum disorder



Multivariate regression models predicting responses to Open Notes

| Predictor Variable                | Health self-efficacy |             |         | Health knowledge |             |         | Patient-clinician alliance |              |         | Negative emotions |             |         |
|-----------------------------------|----------------------|-------------|---------|------------------|-------------|---------|----------------------------|--------------|---------|-------------------|-------------|---------|
|                                   | B                    | 95% CI      | $\beta$ | B                | 95% CI      | $\beta$ | B                          | 95% CI       | $\beta$ | B                 | 95% CI      | $\beta$ |
| Age                               | .00                  | -.02 to .01 | -.03    | .00              | -.02 to .02 | -.05    | .01                        | .00 to .02   | .12     | .00               | -.01 to .01 | -.04    |
| Education                         | -.08                 | -.24 to .09 | -.08    | -.15             | -.31 to .01 | -.15    | -.15*                      | -.29 to -.02 | -.17    | -.09              | -.23 to .04 | -.10    |
| Mental health visits <sup>a</sup> | .00                  | .00 to .01  | .07     | .00              | -.01 to .01 | .01     | .00                        | -.01 to .01  | .02     | .00               | .00 to .01  | .11     |
| Anxiety                           | -.01                 | -.36 to .34 | .00     | -.01             | -.36 to .33 | -.01    | .14                        | -.16 to .43  | .07     | .02               | -.28 to .32 | .01     |
| Depression                        | -.13                 | -.47 to .20 | -.07    | -.19             | -.52 to .13 | -.10    | -.16                       | -.45 to .12  | -.09    | .05               | -.23 to .34 | .03     |
| PTSD                              | .09                  | -.25 to .43 | .04     | .22              | -.12 to .56 | .10     | .30*                       | .01 to .59   | .16     | .45**             | .14 to .73  | .23     |
| Substance use disorder            | -.17                 | -.54 to .21 | -.07    | -.05             | -.42 to .32 | -.02    | -.15                       | -.48 to .17  | -.08    | -.15              | -.47 to .17 | -.07    |
| Personality disorder              | .09                  | -.40 to .57 | .03     | .04              | -.43 to .51 | .01     | -.04                       | -.45 to .37  | -.01    | .41               | .00 to .82  | .15     |
| Psychotic/Bipolar <sup>b</sup>    | .29                  | -.14 to .72 | .11     | .02              | -.40 to .44 | .01     | .12                        | -.25 to .48  | .05     | -.22              | -.59 to .14 | -.09    |

\* $p < .05$ , \*\* $p < .01$ , \*\*\* $p < .001$

<sup>a</sup>Number of mental health visits; <sup>b</sup>Psychotic or bipolar spectrum disorder

---

<sup>a</sup>Health self-efficacy items; <sup>b</sup>Health knowledge items; <sup>c</sup>Patient-clinician alliance items; <sup>d</sup>Negative emotions items; <sup>e</sup>Response options: Select all that apply; excludes participants who reported “never” being upset by their mental health notes (item 8)

Survey item responses regarding experiences reading mental health notes, n=178

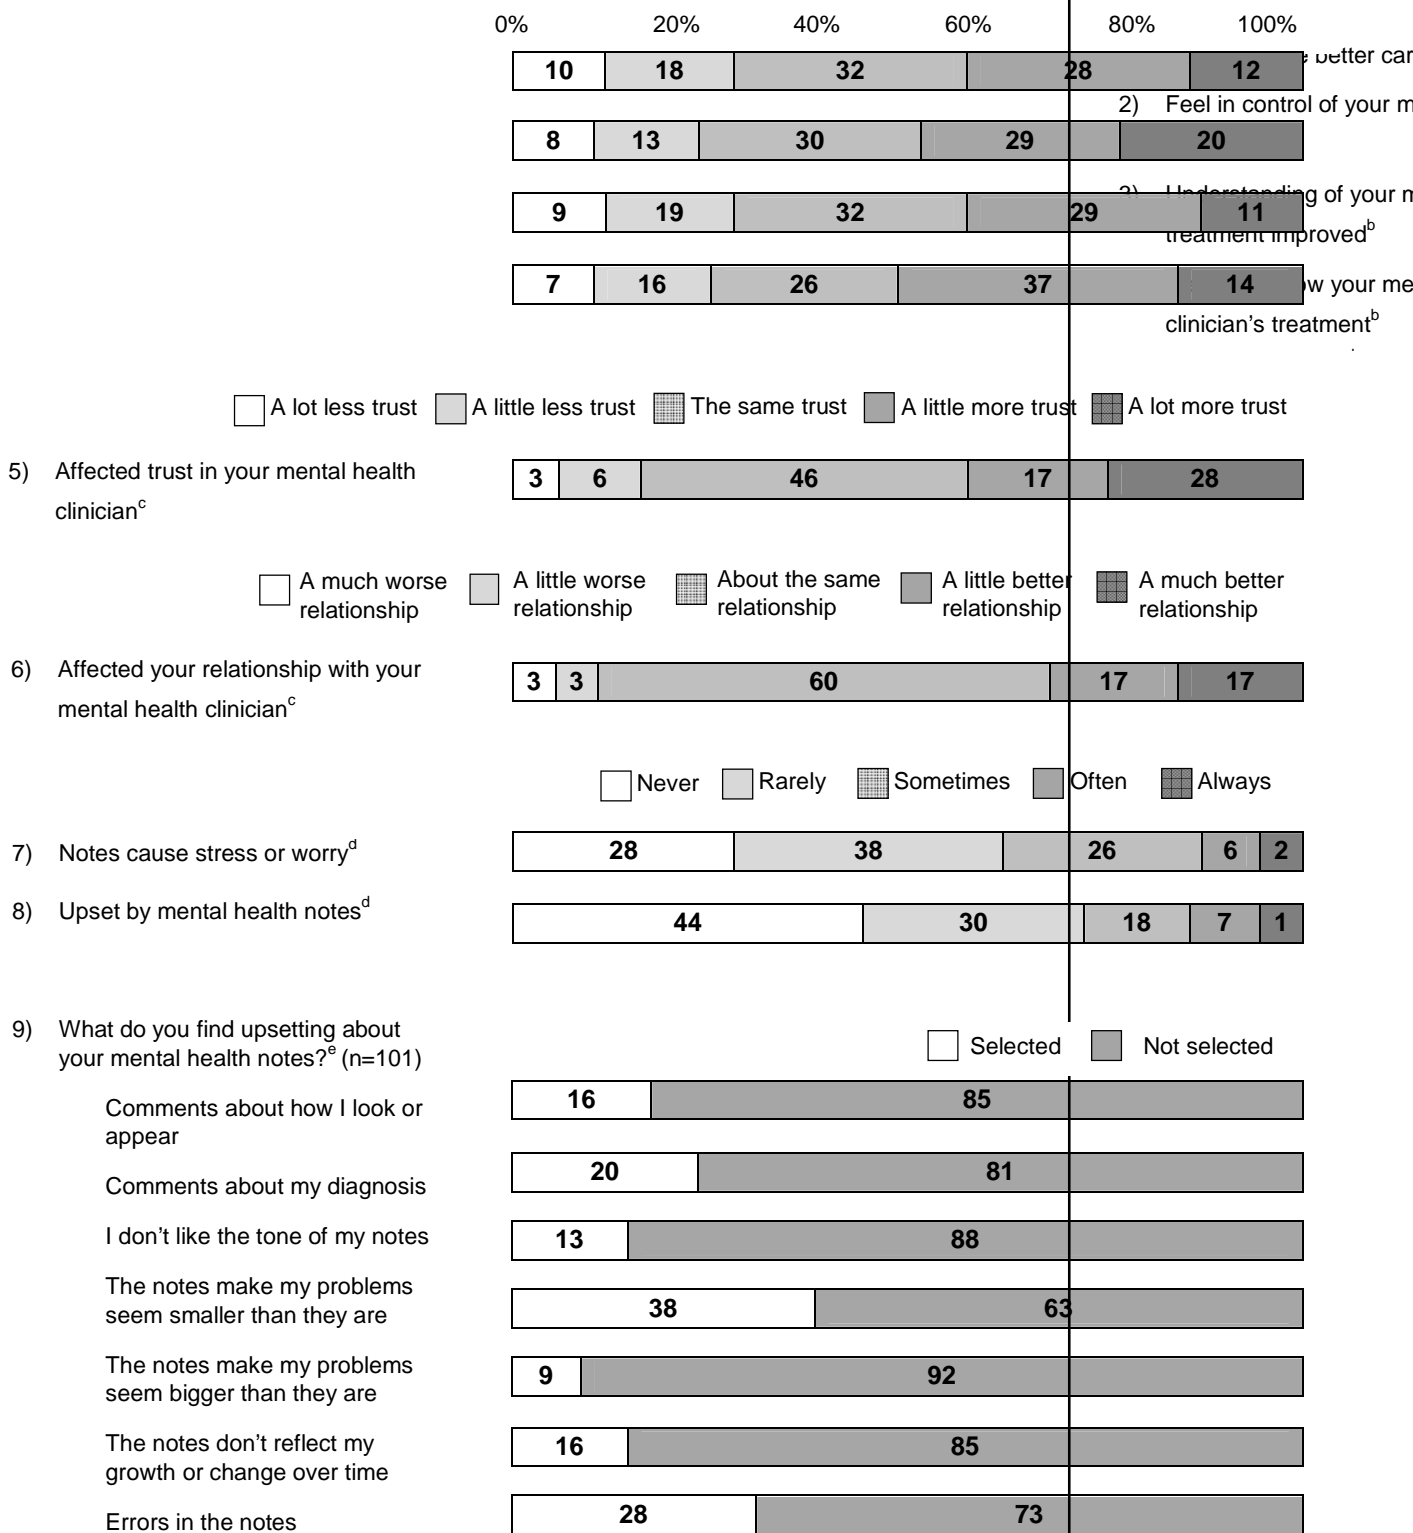

<sup>a</sup>Health self-efficacy items; <sup>b</sup>Health knowledge items; <sup>c</sup>Patient-clinician alliance items; <sup>d</sup>Negative emotions items; <sup>e</sup>Response options: Select all that apply; excludes participants who reported "never" being upset by their mental health notes (item 8)
